# Supplementary material for: Comprehensive analysis of structural variants in breast cancer genomes using single-molecule sequencing
Source: HighWire-hosted journal article supplement (doi:10.1101/gr.260497.119), 2020-09-01
Supplement: Supplemental_Table_5.xlsx [file Supplemental_Table_5.xlsx]

## Sheet: SKBR3
SVid	chr	start	end	type	len	COSMIC	1KGP	Audano
429_SKBR3_PB_ins	1	3181301	3181301	INS	97	PRDM16	0	4
440_SKBR3_PB_ins	1	3269795	3269795	INS	45	PRDM16	0.0379393	5
445_SKBR3_PB_del	1	3287247	3287285	DEL	-38	PRDM16	0	6
1672_SKBR3_PB_del	1	15515843	15516277	DEL	-434	CASP9	0.000399361	0
3135_SKBR3_PB_ins	1	36284741	36284741	INS	52	THRAP3	0	0
4708_SKBR3_PB_del	1	51508182	51508223	DEL	-41	EPS15	0.0091853	0
12600_SKBR3_PB_ins	1	114501659	114501659	INS	50	TRIM33	0	0
13833_SKBR3_PB_ins	1	149023609	149023609	INS	268	PDE4DIP	0	7
15649_SKBR3_PB_ins	1	162727100	162727100	INS	264	DDR2	0	15
26666_SKBR3_PB_ins	1	240777886	240777886	INS	98	RGS7	0	12
177695_SKBR3_PB_ins	10	32031884	32031884	INS	383	KIF5B	0	14
99614_SKBR3_ONT_del	10	68595921	68595973	DEL	-52	TET1	0.00279553	0
181953_SKBR3_PB_ins	10	68683615	68683615	INS	134	TET1	0.0195687	0
200173_SKBR3_PB_del	12	1051902	1051989	DEL	-87	ERC1	0	4
200176_SKBR3_PB_del	12	1079293	1079390	DEL	-97	ERC1	0	13
200179_SKBR3_PB_del	12	1085063	1090773	DEL	-5710	ERC1	0.000399361	4
200184_SKBR3_PB_del	12	1121650	1122141	DEL	-491	ERC1	0.0103834	3
200212_SKBR3_PB_ins	12	1371666	1371666	INS	93	ERC1	0	3
202429_SKBR3_PB_del	12	27652501	27654656	DEL	-2155	PPFIBP1	0	0
204996_SKBR3_PB_ins	12	57100645	57100645	INS	698	STAT6	0	2
211125_SKBR3_PB_ins	12	124357938	124357938	INS	187	NCOR2	0.000399361	0
211134_SKBR3_PB_ins	12	124417139	124417139	INS	129	NCOR2	0	10
212657_SKBR3_PB_ins	13	28065534	28065534	INS	181	FLT3	0	0
217587_SKBR3_PB_del	13	91986857	91986943	DEL	-86	GPC5	0.0451278	0
217594_SKBR3_PB_ins	13	92031753	92031753	INS	108	GPC5	0.0347444	9
121646_SKBR3_ONT_ins	14	81010879	81010879	INS	3291	TSHR	0.00319489	0
239127_SKBR3_PB_ins	16	9848775	9848775	INS	89	GRIN2A	0	2
240454_SKBR3_PB_ins	16	23900040	23900040	INS	158	PRKCB	0	0
240468_SKBR3_PB_ins	16	24021010	24021010	INS	65	PRKCB	0	1
244002_SKBR3_PB_del	16	68598668	68822187	DEL	-223519	CDH1	0	0
244917_SKBR3_PB_del	16	88933252	88933637	DEL	-385	CBFA2T3	0	4
244920_SKBR3_PB_del	16	88954318	88954824	DEL	-506	CBFA2T3	0	2
244922_SKBR3_PB_ins	16	88962140	88962140	INS	144	CBFA2T3	0	1
244923_SKBR3_PB_del	16	88967176	88967228	DEL	-52	CBFA2T3	0.00239617	3
244976_SKBR3_PB_del	16	89745387	89745575	DEL	-188	FANCA	0	10
247416_SKBR3_PB_ins	17	39481860	39481860	INS	108	CDK12	0	0
247422_SKBR3_PB_del	17	39498872	39498936	DEL	-64	CDK12	0.00439297	14
247423_SKBR3_PB_ins	17	39500594	39500594	INS	71	CDK12	0	0
247424_SKBR3_PB_ins	17	39501911	39501911	INS	261	CDK12	0	0
247432_SKBR3_PB_ins	17	39518280	39518280	INS	236	CDK12	0	0
131859_SKBR3_ONT_del	17	39532085	39532127	DEL	-42	CDK12	0	0
247444_SKBR3_PB_ins	17	39535606	39535606	INS	314	CDK12	0	0
247462_SKBR3_PB_ins	17	39554492	39554492	INS	228	CDK12	0	0
247559_SKBR3_PB_ins	17	39696546	39696546	INS	624	ERBB2	0	0
247566_SKBR3_PB_ins	17	39714313	39714313	INS	51	ERBB2	0	0
248345_SKBR3_PB_ins	17	42338015	42338015	INS	58	STAT3	0.000798722	0
21106_SKBR3_10x_lumpy_del	17	80274977	80281004	DEL	-6027	RNF213	0	0
252013_SKBR3_PB_del	17	80355329	80355699	DEL	-370	RNF213	0	1
252014_SKBR3_PB_ins	17	80359635	80359635	INS	61	RNF213	0	1
257556_SKBR3_PB_del	19	1627804	1628428	DEL	-624	TCF3	0	0
257739_SKBR3_PB_ins	19	4122244	4122244	INS	182	MAP2K2	0	14
258191_SKBR3_PB_ins	19	10758283	10758283	INS	379	DNM2	0	15
260245_SKBR3_PB_del	19	40248880	40248954	DEL	-74	AKT2	0	9
30645_SKBR3_PB_ins	2	29803166	29803166	INS	186	ALK	0	2
37357_SKBR3_PB_del	2	100037419	100037524	DEL	-105	AFF3	0	10
44245_SKBR3_PB_ins	2	186605769	186605769	INS	49	ITGAV	0	11
45272_SKBR3_PB_del	2	201281935	201284725	DEL	-2790	CASP8	0.0111821	11
45999_SKBR3_PB_del	2	211860934	211861082	DEL	-148	ERBB4	0.0491214	5
265331_SKBR3_PB_del	20	17333582	42697026	DEL	-25363444	PTPRT	0	0
268491_SKBR3_PB_ins	20	37373426	37373426	INS	38	SRC	0.0239617	1
269227_SKBR3_PB_del	20	42508975	42509036	DEL	-61	PTPRT	0	12
269240_SKBR3_PB_del	20	42652324	42661988	DEL	-9664	PTPRT	0	0
269253_SKBR3_PB_ins	20	42709437	42709437	INS	846	PTPRT	0	0
269352_SKBR3_PB_ins	20	43091716	43091716	INS	207	PTPRT	0	0
274581_SKBR3_PB_del	20	63535749	63535852	DEL	-103	PTK6	0.000798722	3
277591_SKBR3_PB_ins	21	38492621	38492621	INS	147	ERG	0	0
280681_SKBR3_PB_del	22	38962676	38992606	DEL	-29930	APOBEC3B	0.000399361	1
280804_SKBR3_PB_del	22	40501164	40501208	DEL	-44	MKL1	0	7
280810_SKBR3_PB_ins	22	40537697	40537697	INS	587	MKL1	0	14
49420_SKBR3_PB_del	3	8001728	169337952	DEL	-161336224	MECOM	0	0
49573_SKBR3_PB_ins	3	10070602	10070602	INS	210	FANCD2	0.0135783	15
53638_SKBR3_PB_del	3	52271716	52663420	DEL	-391704	PBRM1	0	0
54175_SKBR3_PB_ins	3	60860320	60860320	INS	273	FHIT	0	14
54194_SKBR3_PB_del	3	61141516	61142508	DEL	-992	FHIT	0.0371406	0
54891_SKBR3_PB_del	3	71193195	71193493	DEL	-298	FOXP1	0.0447284	7
54905_SKBR3_PB_ins	3	71396917	71396917	INS	244	FOXP1	0.0259585	10
55226_SKBR3_PB_ins	3	76074018	76074018	INS	91	ROBO2	0	11
55240_SKBR3_PB_ins	3	76272731	76272731	INS	120	ROBO2	0	8
55280_SKBR3_PB_del	3	76956535	76957792	DEL	-1257	ROBO2	0	0
55292_SKBR3_PB_del	3	77108177	77108224	DEL	-47	ROBO2	0	0
55320_SKBR3_PB_ins	3	77294316	77294316	INS	50	ROBO2	0.00758786	9
55334_SKBR3_PB_ins	3	77410504	77410504	INS	110	ROBO2	0.038738	6
59016_SKBR3_PB_del	3	136714922	136714984	DEL	-62	STAG1	0.0151757	2
59655_SKBR3_PB_del	3	142487812	178278466	DEL	-35790654	ATR	0	0
62366_SKBR3_PB_ins	3	169472945	169472945	INS	57	MECOM	0	0
31578_SKBR3_ONT_del	3	169663452	169663491	DEL	-39	MECOM	0.000399361	0
64308_SKBR3_PB_ins	3	185453834	185453834	INS	157	MAP3K13	0	9
64309_SKBR3_PB_ins	3	185455532	185455532	INS	75	MAP3K13	0	6
64676_SKBR3_PB_ins	3	187736781	187736781	INS	46	BCL6	0	0
64741_SKBR3_PB_ins	3	188203552	188203552	INS	80	LPP	0.0175719	6
64800_SKBR3_PB_ins	3	188602144	188602144	INS	116	LPP	0.0167732	3
64830_SKBR3_PB_del	3	188784281	188784334	DEL	-53	LPP	0	15
65013_SKBR3_PB_del	3	189878752	189878949	DEL	-197	TP63	0	3
65949_SKBR3_PB_del	3	195752599	195752653	DEL	-54	MUC4	0	3
66024_SKBR3_PB_del	3	196027929	196028010	DEL	-81	TFRC	0	4
82750_SKBR3_PB_del	5	258670	259089	DEL	-419	SDHA	0.000798722	8
82977_SKBR3_PB_del	5	1285050	1285170	DEL	-120	TERT	0.000399361	3
43953_SKBR3_ONT_del	5	11641591	11641707	DEL	-116	CTNND2	0	2
84181_SKBR3_PB_del	5	11880660	11880785	DEL	-125	CTNND2	0.00279553	15
95160_SKBR3_PB_del	5	158277605	159013537	DEL	-735932	EBF1	0	0
95195_SKBR3_PB_del	5	158468846	158803071	DEL	-334225	EBF1	0	0
95243_SKBR3_PB_ins	5	158943339	158943339	INS	63	EBF1	0.0259585	0
97074_SKBR3_PB_ins	5	177096861	177096861	INS	297	FGFR4	0	14
97428_SKBR3_PB_del	5	180617097	180618047	DEL	-950	FLT4	0	7
9707_SKBR3_10x_lumpy_del	7	74049736	74049994	DEL	-258	ELN	0	0
125428_SKBR3_PB_del	7	75683898	75683955	DEL	-57	HIP1	0.000798722	9
129984_SKBR3_PB_ins	7	101877012	101877012	INS	175	CUX1	0	0
10175_SKBR3_10x_lumpy_dup	7	102216639	102216729	DUP	90	CUX1	0.0283546	0
69882_SKBR3_ONT_del	7	116716274	116716335	DEL	-61	MET	0	0
135889_SKBR3_PB_ins	7	127657387	127657387	INS	390	SND1	0	0
138214_SKBR3_PB_ins	7	146237621	146237621	INS	89	CNTNAP2	0	2
138275_SKBR3_PB_del	7	146822869	146822932	DEL	-63	CNTNAP2	0	4
138314_SKBR3_PB_del	7	147314407	147315504	DEL	-1097	CNTNAP2	0.0483227	1
140059_SKBR3_PB_ins	8	1860342	1860342	INS	69	ARHGEF10	0	8
140060_SKBR3_PB_del	8	1874959	1875193	DEL	-234	ARHGEF10	0.00359425	10
140064_SKBR3_PB_del	8	1888716	1889864	DEL	-1148	ARHGEF10	0.00199681	10
140067_SKBR3_PB_ins	8	1919902	1919902	INS	616	ARHGEF10	0.0343451	11
142122_SKBR3_PB_ins	8	31925950	31925950	INS	87	NRG1	0	13
145303_SKBR3_PB_ins	8	70324830	70324830	INS	443	NCOA2	0	0
145316_SKBR3_PB_ins	8	70339507	70339507	INS	597	NCOA2	0	0
145320_SKBR3_PB_ins	8	70347564	70347564	INS	115	NCOA2	0	0
145328_SKBR3_PB_ins	8	70357484	70357484	INS	351	NCOA2	0	0
145358_SKBR3_PB_ins	8	70395189	70395189	INS	313	NCOA2	0	0
149301_SKBR3_PB_ins	8	79766459	79766459	INS	76	HEY1	0	0
150405_SKBR3_PB_del	8	85227433	113136620	DEL	-27909187	CSMD3	0	0
150710_SKBR3_PB_ins	8	86894614	86894614	INS	68	CNBD1	0	0
150722_SKBR3_PB_ins	8	86936673	86936673	INS	111	CNBD1	0	0
150725_SKBR3_PB_ins	8	86943920	86943920	INS	486	CNBD1	0	0
150754_SKBR3_PB_ins	8	87021413	87021413	INS	221	CNBD1	0	0
150756_SKBR3_PB_ins	8	87024323	87024323	INS	231	CNBD1	0	0
150797_SKBR3_PB_del	8	87136515	87136572	DEL	-57	CNBD1	0	3
150801_SKBR3_PB_ins	8	87147497	87147497	INS	151	CNBD1	0	0
150815_SKBR3_PB_ins	8	87190906	87190906	INS	52	CNBD1	0.000798722	4
150850_SKBR3_PB_del	8	87307058	88870204	DEL	-1563146	CNBD1	0	0
152014_SKBR3_PB_ins	8	89934389	89934389	INS	74	NBN	0	0
152018_SKBR3_PB_ins	8	89938517	89938517	INS	136	NBN	0	0
152029_SKBR3_PB_ins	8	89947982	89947982	INS	100	NBN	0	0
152033_SKBR3_PB_ins	8	89952433	89952433	INS	187	NBN	0	0
152044_SKBR3_PB_ins	8	89969664	89969664	INS	66	NBN	0	0
154142_SKBR3_PB_ins	8	112223545	112223545	INS	90	CSMD3	0	0
154143_SKBR3_PB_ins	8	112227648	112227648	INS	159	CSMD3	0	0
154150_SKBR3_PB_ins	8	112236917	112236917	INS	106	CSMD3	0	0
154155_SKBR3_PB_ins	8	112244853	112244853	INS	253	CSMD3	0	0
154158_SKBR3_PB_ins	8	112248999	112248999	INS	194	CSMD3	0	0
154161_SKBR3_PB_ins	8	112252653	112252653	INS	195	CSMD3	0	0
154168_SKBR3_PB_ins	8	112261486	112261486	INS	406	CSMD3	0	0
154195_SKBR3_PB_ins	8	112286288	112286288	INS	98	CSMD3	0	0
154196_SKBR3_PB_ins	8	112288274	112288274	INS	74	CSMD3	0	0
154203_SKBR3_PB_ins	8	112296430	112296430	INS	73	CSMD3	0	0
154210_SKBR3_PB_del	8	112303990	112304545	DEL	-555	CSMD3	0	0
154213_SKBR3_PB_ins	8	112308620	112308620	INS	362	CSMD3	0	0
154260_SKBR3_PB_ins	8	112377168	112377168	INS	755	CSMD3	0	0
154280_SKBR3_PB_ins	8	112410110	112410110	INS	112	CSMD3	0	6
154313_SKBR3_PB_ins	8	112480648	112480648	INS	199	CSMD3	0	0
154333_SKBR3_PB_ins	8	112520452	112520452	INS	233	CSMD3	0	0
154341_SKBR3_PB_ins	8	112531306	112531306	INS	175	CSMD3	0	0
154362_SKBR3_PB_ins	8	112586799	112586799	INS	278	CSMD3	0	0
154371_SKBR3_PB_ins	8	112611450	112611450	INS	272	CSMD3	0	0
154373_SKBR3_PB_ins	8	112619997	112619997	INS	132	CSMD3	0	0
154380_SKBR3_PB_ins	8	112639224	112639224	INS	162	CSMD3	0	0
154421_SKBR3_PB_ins	8	112718299	112718299	INS	224	CSMD3	0	0
154435_SKBR3_PB_ins	8	112741740	112741740	INS	127	CSMD3	0	0
154441_SKBR3_PB_ins	8	112752899	112752899	INS	51	CSMD3	0	0
154444_SKBR3_PB_ins	8	112761988	112761988	INS	373	CSMD3	0	0
154448_SKBR3_PB_ins	8	112766400	112766400	INS	449	CSMD3	0	0
154466_SKBR3_PB_ins	8	112820848	112820848	INS	100	CSMD3	0	0
154491_SKBR3_PB_ins	8	112858078	112858078	INS	143	CSMD3	0	0
154495_SKBR3_PB_ins	8	112872473	112872473	INS	627	CSMD3	0	0
154532_SKBR3_PB_ins	8	112937389	112937389	INS	201	CSMD3	0	0
154534_SKBR3_PB_ins	8	112942167	112942167	INS	106	CSMD3	0	0
154536_SKBR3_PB_ins	8	112944700	112944700	INS	105	CSMD3	0	0
154550_SKBR3_PB_ins	8	112962347	112962347	INS	338	CSMD3	0	0
154557_SKBR3_PB_ins	8	112980608	112980608	INS	54	CSMD3	0	0
154563_SKBR3_PB_ins	8	112989105	112989105	INS	66	CSMD3	0	0
154582_SKBR3_PB_del	8	113021169	113720680	DEL	-699511	CSMD3	0	0
154584_SKBR3_PB_ins	8	113024486	113024486	INS	207	CSMD3	0	0
154604_SKBR3_PB_ins	8	113074391	113074391	INS	214	CSMD3	0	0
154630_SKBR3_PB_ins	8	113118129	113118129	INS	293	CSMD3	0	0
154635_SKBR3_PB_ins	8	113126952	113126952	INS	116	CSMD3	0	0
154638_SKBR3_PB_ins	8	113132254	113132254	INS	91	CSMD3	0	0
154655_SKBR3_PB_ins	8	113153073	113153073	INS	44	CSMD3	0	2
154660_SKBR3_PB_ins	8	113160839	113160839	INS	72	CSMD3	0	0
154666_SKBR3_PB_ins	8	113170390	113170390	INS	865	CSMD3	0	0
154668_SKBR3_PB_ins	8	113173368	113173368	INS	61	CSMD3	0	0
154670_SKBR3_PB_ins	8	113185876	113185876	INS	142	CSMD3	0	1
154674_SKBR3_PB_ins	8	113194813	113194813	INS	148	CSMD3	0	0
154683_SKBR3_PB_ins	8	113210795	113210795	INS	105	CSMD3	0	0
154698_SKBR3_PB_ins	8	113231015	113231015	INS	40	CSMD3	0	0
154701_SKBR3_PB_ins	8	113233371	113233371	INS	105	CSMD3	0	0
84061_SKBR3_ONT_del	8	113248422	113248478	DEL	-56	CSMD3	0	0
154715_SKBR3_PB_ins	8	113259564	113259564	INS	185	CSMD3	0	0
154719_SKBR3_PB_ins	8	113272139	113272139	INS	135	CSMD3	0	0
154724_SKBR3_PB_del	8	113279335	114045210	DEL	-765875	CSMD3	0	0
154728_SKBR3_PB_ins	8	113291926	113291926	INS	74	CSMD3	0	0
154755_SKBR3_PB_ins	8	113330290	113330290	INS	92	CSMD3	0	0
154781_SKBR3_PB_ins	8	113365906	113365906	INS	328	CSMD3	0	0
154812_SKBR3_PB_del	8	113429548	120889636	DEL	-7460088	CSMD3	0	0
155147_SKBR3_PB_del	8	114193707	117904121	DEL	-3710414	EXT1	0	0
157258_SKBR3_PB_ins	8	117849942	117849942	INS	294	EXT1	0	0
157283_SKBR3_PB_ins	8	117902543	117902543	INS	266	EXT1	0	0
157291_SKBR3_PB_del	8	117913818	118581184	DEL	-667366	EXT1	0	0
157330_SKBR3_PB_ins	8	117994540	117994540	INS	347	EXT1	0	0
157334_SKBR3_PB_ins	8	118008013	118008013	INS	572	EXT1	0	0
157339_SKBR3_PB_ins	8	118019259	118019259	INS	31	EXT1	0.000798722	2
163006_SKBR3_PB_ins	8	127737750	127737750	INS	222	MYC	0	1
163007_SKBR3_PB_ins	8	127739345	127739345	INS	63	MYC	0	0
163008_SKBR3_PB_ins	8	127740274	127740274	INS	202	MYC	0	1
165283_SKBR3_PB_del	9	8622475	8633887	DEL	-11412	PTPRD	0	0
165294_SKBR3_PB_del	9	8782059	8782116	DEL	-57	PTPRD	0.000399361	12
172191_SKBR3_PB_del	9	115069598	115069648	DEL	-50	TNC	0.0443291	6
172741_SKBR3_PB_del	9	121092445	121092591	DEL	-146	CNTRL	0.000399361	15
173631_SKBR3_PB_ins	9	130777995	130777995	INS	80	ABL1	0	9
pbsv.INS.DUP.39135_SKBR3_PB_dup	X	1473604	1473604	INS	33	P2RY8	0.0303514	10
282253_SKBR3_PB_ins	X	1496528	1496528	INS	329	P2RY8	0	9
286671_SKBR3_PB_ins	X	45040364	45040364	INS	165	KDM6A	0	14
286853_SKBR3_PB_del	X	47148595	47148652	DEL	-57	RBM10	0	8
